# Supplementary material for: Epithelial-to-mesenchymal transition, circulating tumor cells and cancer metastasis: Mechanisms and clinical applications
Source: PubMed Central journal article supplement (PMC5655309; doi:10.18632/oncotarget.18277), 2017-05-26
Supplement: oncotarget-08-81558-s001.pdf [file oncotarget-08-81558-s001.pdf]

## **Epithelial-to-mesenchymal transition, circulating tumor cells and cancer metastasis: Mechanisms and clinical applications**

### **SUPPLEMENTARY MATERIALS**

**Supplementary Table 1: Studies on the expression and potential clinical relevance of EMT markers in CTCs of different types of cancer.** See [Supplementary\\_Table\\_1](#)

### **REFERENCES**

137. Raimondi C, Gradilone A, Naso G, Vincenzi B, Petracca A, Nicolazzo C, Palazzo A, Saltarelli R, Spremberg F, Cortesi E, Gazzaniga P. Epithelial-mesenchymal transition and stemness features in circulating tumor cells from breast cancer patients. *Breast Cancer Res Treat.* 2011; 130:449–455.
